# Supplementary material for: Clostridium sordellii Pathogenicity Locus Plasmid pCS1-1 Encodes a Novel Clostridial Conjugation Locus
Source: PubMed Central journal article supplement (PMC5770547; doi:10.1128/mbio.01761-17), 2018-01-16
Supplement: mbo001183687st1.pdf [file mbo001183687st1.pdf]

| Locus tag<br>ATCC9714PCS11_“x” | ORF          | Predicted function                        | pCP13<br>homologue<br>(aa identity) | pCLL<br>homologue<br>(aa identity) | <i>C. difficile</i> P49<br>homologue<br>(aa identity) | pCP13 vs. pCLL<br>(aa identity) | pCP13 vs.<br>CdP49<br>(aa identity) | pCLL vs.<br>CdP49<br>(aa identity) |
|--------------------------------|--------------|-------------------------------------------|-------------------------------------|------------------------------------|-------------------------------------------------------|---------------------------------|-------------------------------------|------------------------------------|
| 00231                          | <i>cnaB</i>  | Surface protein, putative adhesion factor | <i>pcp57/cnaB</i><br>(43.0%)        | -                                  | -                                                     | -                               | -                                   | -                                  |
| 00241                          | <i>241</i>   | Unknown                                   | -                                   | -                                  | -                                                     | -                               | -                                   | -                                  |
| 00251                          | <i>251</i>   | Unknown                                   | -                                   | -                                  | -                                                     | -                               | -                                   | -                                  |
| 00261                          | <i>topA</i>  | Type I Topoisomerase                      | <i>pcp47/topA</i><br>(50.9%)        | -                                  | QUA_0964<br>(58.8%)                                   | -                               | -                                   | -                                  |
| 00271                          | <i>271</i>   | Unknown                                   | -                                   | -                                  | -                                                     | -                               | -                                   | -                                  |
| 00281                          | <i>281</i>   | Transmembrane protein                     | -                                   | -                                  | -                                                     | -                               | -                                   | -                                  |
| 00291                          | <i>cstA</i>  | Membrane protein                          | <i>pcp53</i><br>(40.8%)             | <i>cll4</i> (35.5%)                | QUA_0952<br>(35.5%)                                   | 68.0%                           | 56.4%                               | 55.1%                              |
| 00301                          | <i>cstD4</i> | VirD4-like ATPase<br>(Coupling Protein)   | <i>pcp51</i><br>(49.3%)             | <i>cll5</i> (51.9%)                | QUA_0953<br>(55.5%)                                   | 55.4%                           | 49.2%                               | 51.8%                              |
| 00311                          | <i>cstB6</i> | VirB6-like membrane<br>channel protein    | <i>pcp50</i><br>(35.5%)             | <i>cll6</i> (28.7%)                | QUA_0954<br>(32.2%)                                   | 37.4%                           | 29.1%                               | 28.5%                              |
| 00321                          | <i>cstE</i>  | Unknown                                   | <i>pcp49</i><br>(38.0%)             | <i>cll7</i> (34.8%)                | QUA_0955<br>(52.7%)                                   | 52.2%                           | 46.7%                               | 40.5%                              |
| 00331                          | <i>cstF</i>  | Unknown                                   | <i>pcp48</i><br>(41.5%)             | <i>cll8</i> (38.6%)                | QUA_0956<br>(45.0%)                                   | 53.1%                           | 41.6%                               | 45.9%                              |
| 00341                          | <i>cstB4</i> | VirB4-like ATPase                         | <i>pcp46</i><br>(51.9%)             | <i>cll9</i> (52.8%)                | QUA_0957<br>(53.3%)                                   | 63.9%                           | 48.9%                               | 50.9%                              |
| 00351                          | <i>cstH</i>  | Phage protein                             | -                                   | -                                  | -                                                     | -                               | -                                   | -                                  |
| 00361                          | <i>cstI</i>  | Unknown                                   | -                                   | -                                  | QUA_0958<br>(27.2%)                                   | -                               | -                                   | -                                  |
| 00371                          | <i>cstB1</i> | Muramidase                                | <i>pcp44</i><br>(57.7%)             | <i>cll11</i><br>(56.9%)            | QUA_0959<br>(42.6%)                                   | 59.3%                           | 45.7%                               | 42.3%                              |
| 00381                          | <i>cstK</i>  | Single stranded DNA<br>binding protein    | -                                   | <i>cll19</i><br>(30.4%)            | QUA_0963<br>(36.0%)                                   | -                               | -                                   | 27.0%                              |
| 00391                          | <i>cstL</i>  | Unknown                                   | -                                   | -                                  | QUA_0965<br>(31.8%)                                   | -                               | -                                   | -                                  |
| 00401                          | <i>cstM</i>  | CopG family protein                       | <i>pcp41</i><br>(28.6%)             | <i>cll13</i><br>(40.3%)            | QUA_0966<br>(27.3%)                                   | 48.3%                           | 38.1%                               | 39.8%                              |

|       |              |                     |                         |                         |                     |       |       |       |
|-------|--------------|---------------------|-------------------------|-------------------------|---------------------|-------|-------|-------|
| 00411 | <i>cstN</i>  | CopG family protein | <i>pcp41</i><br>(40.2%) | <i>cll13</i><br>(41.9%) | QUA_0966<br>(39.3%) | 48.3% | 38.1% | 39.8% |
| 00421 | <i>cstO</i>  | Unknown             | -                       | -                       | -                   | -     | -     | -     |
| 00431 | <i>cstD2</i> | Relaxase            | <i>pcp39</i><br>(43.5%) | <i>cll15</i><br>(44.9%) | QUA_0968<br>(50.9%) | 53.1% | 45.5% | 47.1% |
| 00441 | <i>cstQ</i>  | Unknown             | -                       | -                       | QUA_0969<br>(32.3%) | -     | -     | -     |
| 00451 | <i>cstR</i>  | Unknown             | <i>pcp36</i><br>(43.5%) | -                       | QUA_0971<br>(44.0%) | -     | 40.6% | -     |
