# Supplementary material for: Clostridium sordellii Pathogenicity Locus Plasmid pCS1-1 Encodes a Novel Clostridial Conjugation Locus
Source: PubMed Central journal article supplement (PMC5770547; doi:10.1128/mbio.01761-17), 2018-01-16
Supplement: mbo001183687st2.pdf [file mbo001183687st2.pdf]

| Strain                                        | Characteristics                                                                     | Reference  | Accession number |
|-----------------------------------------------|-------------------------------------------------------------------------------------|------------|------------------|
| <i>Clostridium sordellii</i>                  |                                                                                     |            |                  |
| ATCC9714                                      | Reference, cause of oedema, contains pCS1-1                                         | (1), (2)   | LN679998         |
| R28058                                        | Isolated from infected crushed hand, Tet <sup>R</sup>                               | (2)        | CEKZ00000000     |
| 7543-A                                        | Unknown origin, pCS1-6                                                              | (3)        | N/A              |
| 7508-A                                        | Unknown origin, pCS1-7                                                              | (3)        | N/A              |
| S0804018                                      | Equine intestinal disease, pCS1-5                                                   | This study | N/A              |
| DLL5002 [ <i>tcsLTT</i> ]                     | ATCC9714(pDLL230), Erm <sup>R</sup>                                                 | (4)        | N/A              |
| DLL5078                                       | DLL5002xR28058 transconjugant, R28058(pDLL230), Tet <sup>R</sup> , Erm <sup>R</sup> | This study | N/A              |
| DLL5138 [ <i>parBTT1</i> ]                    | ATCC9714(pCS1-1 $\Omega$ <i>parB</i> ::TT), independent mutant 1, Erm <sup>R</sup>  | This study | N/A              |
| DLL5142 [ <i>parBTT2</i> ]                    | ATCC9714(pCS1-1 $\Omega$ <i>parB</i> ::TT), independent mutant 2, Erm <sup>R</sup>  | This study | N/A              |
| DLL5153                                       | pCS1-1 free DLL5142, Str <sup>R</sup> , Rif <sup>R</sup>                            | This study | N/A              |
| DLL5132 [ <i>srtBTT1</i> ]                    | ATCC9714(pCS1-1 $\Omega$ <i>srtB</i> ::TT), independent mutant 1, Erm <sup>R</sup>  | This study | N/A              |
| DLL5134 [ <i>srtBTT2</i> ]                    | ATCC9714(pCS1-1 $\Omega$ <i>srtB</i> ::TT), independent mutant 2, Erm <sup>R</sup>  | This study | N/A              |
| DLL5181 [ <i>cstD4TT1</i> ]                   | ATCC9714(pCS1-1 $\Omega$ <i>cstD4</i> ::TT), independent mutant 1, Erm <sup>R</sup> | This study | N/A              |
| DLL5183 [ <i>cstD4TT2</i> ]                   | ATCC9714(pCS1-1 $\Omega$ <i>cstD4</i> ::TT), independent mutant 2, Erm <sup>R</sup> | This study | N/A              |
| DLL5188 [ <i>cstB4TT1</i> ]                   | ATCC9714(pCS1-1 $\Omega$ <i>cstB4</i> ::TT), independent mutant 1, Erm <sup>R</sup> | This study | N/A              |
| DLL5190 [ <i>cstB4TT2</i> ]                   | ATCC9714(pCS1-1 $\Omega$ <i>cstB4</i> ::TT), independent mutant 2, Erm <sup>R</sup> | This study | N/A              |
| DLL5216 [ <i>cstD4TT(cstD4<sup>+</sup>)</i> ] | DLL5181(pDLL183), Erm <sup>R</sup> , Tm <sup>R</sup>                                | This study | N/A              |
| DLL5217 [ <i>cstD4TT(V)</i> ]                 | DLL5181(pRPF185), Erm <sup>R</sup> , Tm <sup>R</sup>                                | This study | N/A              |
| DLL5232 [ <i>cstB4TT(cstB4<sup>+</sup>)</i> ] | DLL5188(pDLL212), Erm <sup>R</sup> , Tm <sup>R</sup>                                | This study | N/A              |
| DLL5230 [ <i>cstB4TT(V)</i> ]                 | DLL5188(pRPF185), Erm <sup>R</sup> , Tm <sup>R</sup>                                | This study | N/A              |
| <i>C. difficile</i>                           |                                                                                     |            |                  |
| P49                                           | Unknown origin, contig 15 analysed                                                  | N/A        | AVMN01000016     |
| 133                                           | Human, node 23 analysed                                                             | N/A        | NZ_MBGB01000023  |
| 20110869                                      | Unknown origin, scaffold 00059 analysed                                             | N/A        | NZ_MTVT01000059  |

1. **Hall IC, Scott, J.P.** 1927. *Bacillus sordellii*, a Cause of Malignant Edema in Man. J Infect Dis **41**:329-335.
2. **Couchman EC, Browne HP, Dunn M, Lawley TD, Songer JG, Hall V, Petrovska L, Vidor C, Awad M, Lyras D, Fairweather NF.** 2015. *Clostridium sordellii* genome analysis reveals plasmid localized toxin genes encoded within pathogenicity loci. BMC Genomics **16**:392.
3. **Thiele TL, Stuber TP, Hauer PJ.** 2013. Detection of *Clostridium sordellii* strains expressing hemorrhagic toxin (TcsH) and implications for diagnostics and regulation of veterinary vaccines. Vaccine **31**:5082-5087.
4. **Carter GP, Awad MM, Hao Y, Thelen T, Bergin IL, Howarth PM, Seemann T, Rood JI, Aronoff DM, Lyras D.** 2011. TcsL is an essential virulence factor in *Clostridium sordellii* ATCC 9714. Infect Immun **79**:1025-1032.
