# Supplementary material for: Clostridium sordellii Pathogenicity Locus Plasmid pCS1-1 Encodes a Novel Clostridial Conjugation Locus
Source: PubMed Central journal article supplement (PMC5770547; doi:10.1128/mbio.01761-17), 2018-01-16
Supplement: mbo001183687st3.pdf [file mbo001183687st3.pdf]

| Plasmid | Characteristics                                                                                                                                                                                               | Reference  | Accession number    |
|---------|---------------------------------------------------------------------------------------------------------------------------------------------------------------------------------------------------------------|------------|---------------------|
| pCS1-1  | <i>C. sordellii</i> ATCC9714 pCS1 plasmid, <i>tcsL</i> <sup>+</sup> , <i>tcsH</i> <sup>+</sup> , <i>tcs</i> <sup>+</sup>                                                                                      | (1)        | LN679999            |
| pCS1-2  | <i>C. sordellii</i> JGS6364 pCS1 plasmid, <i>tcsL</i> <sup>+</sup> , <i>tcsH</i> <sup>+</sup> , <i>tcs</i> <sup>+</sup>                                                                                       | (1)        | LN681232            |
| pCS1-3  | <i>C. sordellii</i> JGS6382 pCS1 plasmid, <i>tcsL</i> <sup>+</sup> , <i>tcsH</i> <sup>+</sup> , <i>tcs</i> <sup>+</sup>                                                                                       | (1)        | LN681235            |
| pCS1-4  | <i>C. sordellii</i> UMC2 pCS1 plasmid, <i>tcsL</i> <sup>+</sup> , <i>tcsH</i> <sup>+</sup> , <i>tcs</i> <sup>+</sup>                                                                                          | (1)        | LN681233            |
| pCS1-5  | <i>C. sordellii</i> S0804018 pCS1 plasmid, <i>tcsL</i> <sup>+</sup> , <i>tcsH</i> <sup>+</sup> , <i>tcs</i> <sup>+</sup>                                                                                      | This study | MG205643            |
| pCS1-6  | <i>C. sordellii</i> 7543-A pCS1 plasmid, <i>tcsL</i> <sup>+</sup> , <i>tcsH</i> <sup>+</sup> , <i>tcs</i> <sup>+</sup>                                                                                        | This study | MG205642            |
| pCS1-7  | <i>C. sordellii</i> 7508-A pCS1 plasmid, <i>tcsL</i> <sup>+</sup> , <i>tcsH</i> <sup>+</sup> , <i>tcs</i> <sup>+</sup>                                                                                        | This study | MG205641            |
| pDLL230 | pCS1-1 $\Omega$ <i>tcsL</i> ::TT                                                                                                                                                                              | (2)        | N/A                 |
| pip501  | Broad host range conjugative plasmid, contains Tra locus                                                                                                                                                      | (3)        | AJ505823,<br>L39769 |
| pCW3    | <i>C. perfringens</i> conjugative tetracycline resistance plasmid                                                                                                                                             | (4)        | DQ366035            |
| pCP13   | <i>C. perfringens</i> , encodes beta2 toxin                                                                                                                                                                   | (5)        | AP003515            |
| pCLL    | <i>C. botulinum</i> conjugative neurotoxin plasmid                                                                                                                                                            | (6)        | CP001057            |
| pVS520  | Tra <sup>+</sup> , Mob <sup>+</sup> , RP4 derivative, Tet <sup>R</sup>                                                                                                                                        | (7)        | N/A                 |
| pDLL46  | pMTL9361 derivative with BsrGI and HindIII sites removed from <i>rep</i> , contains RP4 and Tn916 oriTs and <i>lacZa</i> within retargeting region for blue white screening, Cm <sup>R</sup> /Tm <sup>R</sup> | This study | N/A                 |
| pDLL116 | pDLL46 retargeted to 621/622s site of <i>srtB</i> , Cm <sup>R</sup> /Tm <sup>R</sup>                                                                                                                          | This study | N/A                 |
| pDLL120 | pDLL46 retargeted to 117/118s site of <i>parB</i> , Cm <sup>R</sup> /Tm <sup>R</sup>                                                                                                                          | This study | N/A                 |
| pDLL143 | pDLL46 retargeted to 1611/1612s site of <i>cstD4</i> , Cm <sup>R</sup> /Tm <sup>R</sup>                                                                                                                       | This study | N/A                 |
| pDLL147 | pDLL46 retargeted to 1392/1393s site of <i>cstB4</i> , Cm <sup>R</sup> /Tm <sup>R</sup>                                                                                                                       | This study | N/A                 |
| pRPF185 | Clostridial tetracycline inducible expression vector, Cm <sup>R</sup> /Tm <sup>R</sup>                                                                                                                        | (8)        | N/A                 |
| pDLL183 | pRPF185 carrying <i>cstD4</i> with its predicted RBS under a tetracycline inducible promoter, Cm <sup>R</sup> /Tm <sup>R</sup>                                                                                | This study | N/A                 |
| pDLL212 | pRPF185 carrying <i>cstB4</i> with its predicted RBS under a tetracycline inducible promoter, Cm <sup>R</sup> /Tm <sup>R</sup>                                                                                | This study | N/A                 |
| pWBG745 | <i>S. aureus</i> pWBG749-family plasmid                                                                                                                                                                       | (9)        | GQ900389            |

- Couchman EC, Browne HP, Dunn M, Lawley TD, Songer JG, Hall V, Petrovska L, Vidor C, Awad M, Lyras D, Fairweather NF.** 2015. *Clostridium sordellii* genome analysis reveals plasmid localized toxin genes encoded within pathogenicity loci. BMC Genomics **16**:392.
- Carter GP, Awad MM, Hao Y, Thelen T, Bergin IL, Howarth PM, Seemann T, Rood JI, Aronoff DM, Lyras D.** 2011. TcsL is an essential virulence factor in *Clostridium sordellii* ATCC 9714. Infect Immun **79**:1025-1032.
- Thompson JK, Collins MA.** 2003. Completed sequence of plasmid pip501 and origin of spontaneous deletion derivatives. Plasmid **50**:28-35.
- Rood JI, Maher EA, Somers EB, Campos E, Duncan CL.** 1978. Isolation and Characterization of Multiply Antibiotic-Resistant *Clostridium perfringens* Strains from Porcine Feces. Antimicrob Agents Chemother **13**:871-880.
- Shimizu T, Ohtani K, Hirakawa H, Ohshima K, Yamashita A, Shiba T, Ogasawara N, Hattori M, Kuhara S, Hayashi H.** 2002. Complete genome sequence of *Clostridium perfringens*, an anaerobic flesh-eater. Proceedings of the National Academy of Sciences **99**:996-1001.
- Marshall KM, Bradshaw M, Johnson EA.** 2010. Conjugative Botulinum Neurotoxin-Encoding Plasmids in *Clostridium botulinum*. PLoS ONE **5**:e11087.
- Palombo EA, Yusoff K, Stanisich VA, Krishnapillai V, Willetts NS.** 1989. Cloning and genetic analysis of tra cistrons of the Tra 2/Tra 3 region of plasmid RP1. Plasmid **22**:59-69.
- Fagan RP, Fairweather NF.** 2011. *Clostridium difficile* has two parallel and essential Sec secretion systems. J Biol Chem **286**:27483-27493.
- O'Brien FG, Ramsay JP, Monecke S, Coombs GW, Robinson OJ, Htet Z, Alshaikh FA, Grubb WB.** 2015. *Staphylococcus aureus* plasmids without mobilization genes are mobilized by a novel conjugative plasmid from community isolates. J Antimicrob Chemother **70**:649-652.
