# Supplementary material for: Clostridium sordellii Pathogenicity Locus Plasmid pCS1-1 Encodes a Novel Clostridial Conjugation Locus
Source: PubMed Central journal article supplement (PMC5770547; doi:10.1128/mbio.01761-17), 2018-01-16
Supplement: mbo001183687st4.pdf [file mbo001183687st4.pdf]

| Primer | Sequence (5'-3')                                                    | Use                                                                        |
|--------|---------------------------------------------------------------------|----------------------------------------------------------------------------|
| DLP104 | GGTGGTTGATAGAGTTGGAGGTATTG                                          | Internal <i>tetA</i> (P) (+) for screening transconjugants                 |
| DLP105 | TTGCTTCCTGCATCATATACTTCTTG                                          | Internal <i>tetB</i> (P) (-), screening transconjugants                    |
| DLP285 | CTAATTTGAATCCTATATCAGGAGCGG                                         | Internal ATCC9714PCS11_00781 (+), screening transconjugants                |
| DLP286 | TCCAACACTTAATTCATCTCCAGTAAGTG                                       | Internal ATCC9714PCS11_00781 (-), screening transconjugants                |
| DLP287 | AGATGAAGCGATGAAGATATACTCACAAG                                       | Internal ATCC9714PCS11_00261[ <i>topA</i> ] (+), screening transconjugants |
| DLP288 | CCGTATATGTTCTGATCCATCTTTC                                           | Internal ATCC9714PCS11_00261[ <i>topA</i> ] (-), screening transconjugants |
| DLP289 | TTAATTGGAGTTAGTGTAGGGTCGCC                                          | Internal ATCC9714PCS11_00521 (+), screening transconjugants                |
| DLP290 | CCCAACGAATTGCAGCTCTACTAC                                            | Internal ATCC9714PCS11_00521 (-), screening transconjugants                |
| DLP304 | CAAGAACGATTTATGTGTCTCCTACTGG                                        | Internal R28058_18131 (+), screening transconjugants                       |
| DLP306 | CATCATGCTTAACTCCCATACCTTCC                                          | Internal R28058_18131 (-), screening transconjugants                       |
| DLP377 | AACTTTCAACTCTTGAGGCAAAGG                                            | Internal <i>parB</i> (+), screening of mutants, generation of probe        |
| DLP378 | CCTACCTGTGTAGGACTCAGTCCAG                                           | Internal <i>parB</i> (-), screening of mutants, generation of probe        |
| DLP383 | AAAAAAGCTTATAATTATCCTTAGATAGC<br>GACAAGGTGCGCCAGATAGGGTG            | <i>srtB</i> TargeTron IBS (+)                                              |
| DLP384 | CAGATTGTACAAATGTGGTGATAACAGAT<br>AAGTCGACAAGATTAACCTTCTTTG<br>T     | <i>srtB</i> TargeTron EBS1d (-)                                            |
| DLP385 | TGAACGCAAGTTTCTAATTTTCGATTCTATC<br>TCGATAGAGGAAAGTGTCT              | <i>srtB</i> TargeTron EBS2 (+)                                             |
| DLP389 | AAAAAAGCTTATAATTATCCTTAGATTTT<br>GCTGAAGTGCAGCCAGATAGGGTG           | <i>parB</i> TargeTron IBS (+)                                              |
| DLP390 | CAGATTGTACAAATGTGGTGATAACAGAT<br>AAGTCGCTGAAGATAACTTACCTTCTTTG<br>T | <i>parB</i> TargeTron EBS1d (-)                                            |
| DLP391 | TGAACGCAAGTTTCTAATTTTCGATTAAATC<br>TCGATAGAGGAAAGTGTCT              | <i>parB</i> TargeTron EBS2 (+)                                             |
| DLP398 | TGGAAGCATTTTTATGGATTATCGAG                                          | Internal <i>srtB</i> (+), screening of mutants, generation of probe        |
| DLP399 | ATGAACTACAGTTCTTGCATTATCAAATT                                       | Internal <i>srtB</i> (-), screening of mutants, generation of probe        |
| DLP474 | AAATCTAATTCCTCCAATACAGATTCAAA                                       | Internal <i>cstD4</i> (+), screening of mutants, generation of probe       |
| DLP475 | ATCTAATTCACGACCTAGACAAACTG                                          | Internal <i>cstD4</i> (-), screening of mutants, generation of probe       |
| DLP476 | AAAAAAGCTTATAATTATCCTTAGAAGTC<br>ACATCAGTGCAGCCAGATAGGGTG           | <i>cstD4</i> TargeTron IBS (+)                                             |
| DLP477 | CAGATTGTACAAATGTGGTGATAACAGAT<br>AAGTCACATCAGATAACTTACCTTCTTTG<br>T | <i>cstD4</i> TargeTron EBS1d (-)                                           |
| DLP478 | TGAACGCAAGTTTCTAATTTTCGATTACTTC<br>TCGATAGAGGAAAGTGTCT              | <i>cstD4</i> TargeTron EBS2 (+)                                            |
| DLP479 | ATCTACTGAATATGCACCAGATAAATATC<br>C                                  | Internal <i>cstB4</i> (+), screening of mutants, generation of probe       |
|        |                                                                     |                                                                            |

|         |                                                                      |                                                                                         |
|---------|----------------------------------------------------------------------|-----------------------------------------------------------------------------------------|
| DLP480  | GCCTCTCTTTCAAAGCTAGTTAAATAGTCA                                       | Internal <i>cstB4</i> (-), screening of mutants, generation of probe                    |
| DLP481  | AAAAAAGCTTATAATTATCCTTAATTTTCA<br>ACGCTGTGCGCCAGATAGGGTG             | <i>cstB4</i> TargeTron IBS (+)                                                          |
| DLP482  | CAGATTGTACAAATGTGGTGATAACAGAT<br>AAGTCAACGCTCATAACTTACCTTTCTTTG<br>T | <i>cstB4</i> TargeTron EBS1d (-)                                                        |
| DLP483  | TGAACGCAAGTTTCTAATTTTCGGTTAAAA<br>TCCGATAGAGGAAAGTGTCT               | <i>cstB4</i> TargeTron EBS2 (+)                                                         |
| DLP634  | TTTTTTGAGCTCTTTTTTAAAGAAGGTGAT<br>TTTTATTGGATTATTA                   | Amplify <i>cstD4</i> and predicted RBS (+), introduces SacI site                        |
| DLP574  | CGGGATCCCGTTGATACTAAAGCCATAA<br>AATCCATC                             | Amplify <i>cstD4</i> and predicted RBS (-), introduces BamHI site                       |
| DLP635  | AAAAAAGAGCTCAAAAAATTGAAAGGAT<br>GATAATAACTATGATAAAAAG                | Amplify <i>cstB4</i> and predicted RBS (+), introduces SacI site                        |
| DLP636  | CGGGATCCCGCCGTAGGAATTTGAGGTTG<br>TATGG                               | Amplify <i>cstB4</i> and predicted RBS (-), introduces BamHI site                       |
| DLP686  | CTCTTCTTCAACATTATCTATGACAGAGTC                                       | Close and sequence pCS1-3 plasmids from 7543-A and 7508-A (-)                           |
| DLP687  | TGAAGGGAGGAATTACAATGAGTGAG                                           | Close and sequence pCS1-3 plasmids from 7543-A and 7508-A (+)                           |
| DLP688  | CCTAAATATCCTAGAACTCCCATATCACC                                        | Close and sequence pCS1-5 plasmid from S0804018 (-)                                     |
| DLP689  | AGGAACTCTATTTAATCCAATGGCTG                                           | Close and sequence pCS1-5 plasmid from S0804018 (+)                                     |
| JRP4324 | GGTAAATGGATAAATAAAGAAGAAAG                                           | Internal <i>tcsL</i> (+), screening of transconjugants                                  |
| JRP4325 | GATATATGAGTAGCATATTCAGAG                                             | Internal <i>tcsL</i> (-), screening of transconjugants                                  |
| JRP3590 | AATAAGTAAACAGGTAACGTCT                                               | Internal <i>ermB</i> (+), screening of transconjugants and mutants, generation of probe |
| JRP4555 | GTTTACTTTGGCGTGTTCATTGC                                              | Internal <i>ermB</i> (-), screening of transconjugants and mutants, generation of probe |
| JRP4589 | TTACAGTTCAAACCCAACCTATGG                                             | Internal <i>sdl</i> (+), screening of transconjugants                                   |
| JRP4590 | TGCAGCTTGACATCTTTGCTCTTA                                             | Internal <i>sdl</i> (-), screening of transconjugants                                   |
| JRP4330 | CTCAGTACTGAGAGGGAACCTTAGATGGTA<br>T                                  | Internal <i>catP</i> (+), screening of mutants, generation of probe                     |
| JRP4331 | CCGGGATCCTTAGGGTAACAAAAACACC                                         | Internal <i>catP</i> (-), screening of mutants, generation of probe                     |
| JRP3867 | CGAAATTAGAACTTGCGTTCAGTAAAC                                          | TargeTron EBS universal                                                                 |
